# Supplementary material for: Toll-like receptor 4 and protease-activated receptor 2 in physiology and pathophysiology of the nervous system: more than just receptor cooperation?
Source: PubMed Central journal article supplement — Neural Regen Res. 2019 Jul;14(7):1196–201. doi: 10.4103/1673-5374.251290 (PMC6425834; doi:10.4103/1673-5374.251290), 2019-07
Supplement: NRR-14-1196_Suppl1.pdf [file NRR-14-1196_Suppl1.pdf]

**OPEN PEER REVIEW REPORT 1**

**Name of journal:** Neural Regeneration Research

**Manuscript NO:** NRR-D-18-00876

**Title:** Toll-like receptor 4 and protease-activated receptor 2 in physiology and pathophysiology of the nervous system: more than just receptor cooperation?

**Reviewer's Name:** Leonardo Cocito

**Reviewer's country:** Italy

**Date sent for review:** 2018-12-17

**Date reviewed:** 2018-12-29

**Review time:** 12 days

**COMMENTS TO AUTHORS**

It is an interesting and well written paper which reviews the current knowledge on receptors "TLR4" and "PAR2" in physiology and pathophysiology of the nervous system. The paper includes an exhaustive and updated review of the literature on the topic. Obviously, the attention is mainly focused on experimental studies, but the content of the paper has also some clinical interest, as far as it may contribute to elucidate possible inflammatory mechanisms in neurodegenerative disease, with the perspective of envisaging innovative therapeutic strategies.

A few formal remarks involve the following points:

A few references are quoted in the text as "(reviewed (...)). I feel the double brackets are redundant, and quotations could be more simply indicated as "reviewed in ..."

In the reference list, a few journals titles are sometimes quoted in an inconsistent way (e.g. the Journal of biological chemistry is either abbreviated according to the standard system or indicated in the full length). The authors should carefully revise the list in order to assure a uniform style of journal quotations.
